# Supplementary material
Source: PubMed Central journal article supplement (PMC4481139)

# Supp. Figure 1

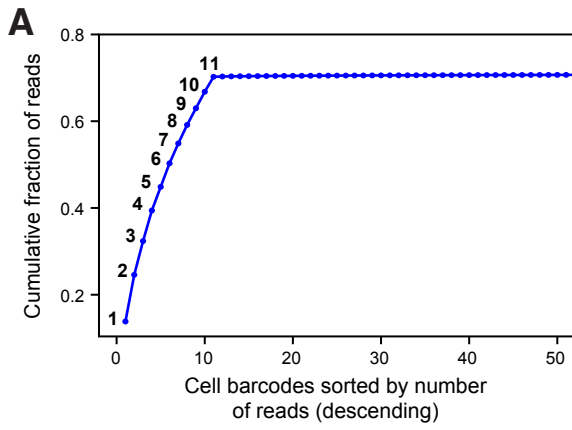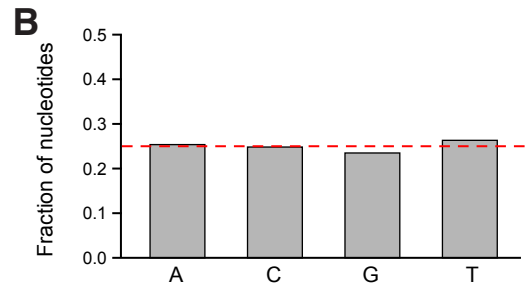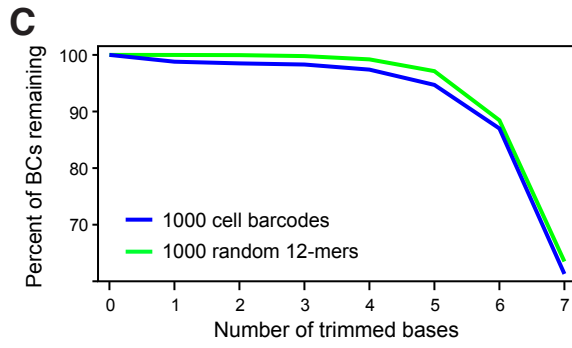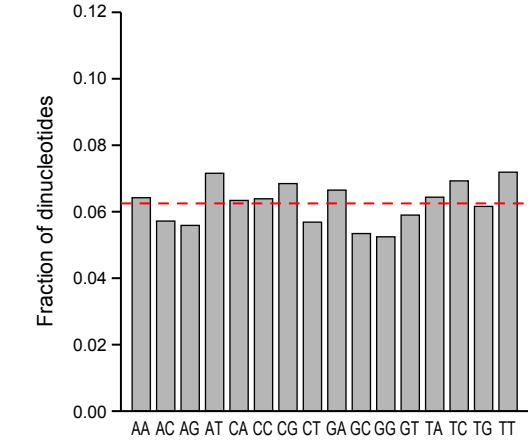

Supplement: NIHMS687993-supplement-Figure_S1.pdf [file NIHMS687993-supplement-Figure_S1.pdf]

A

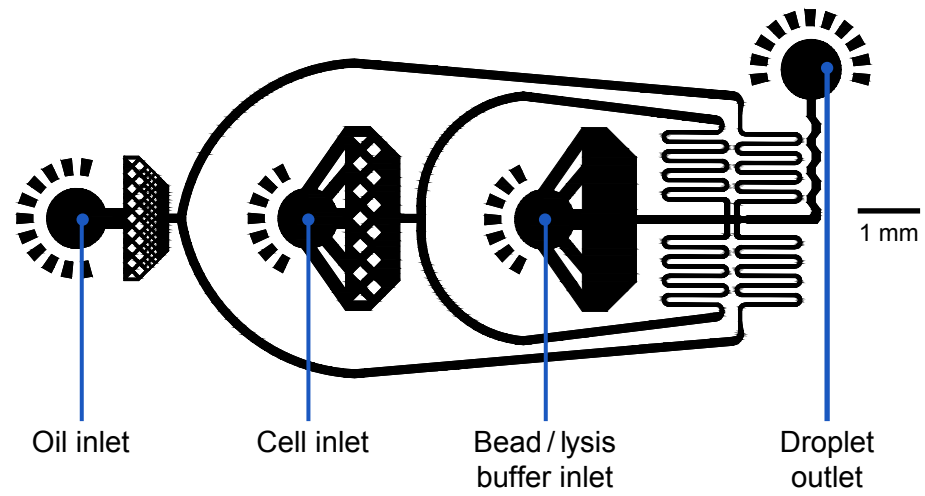

B

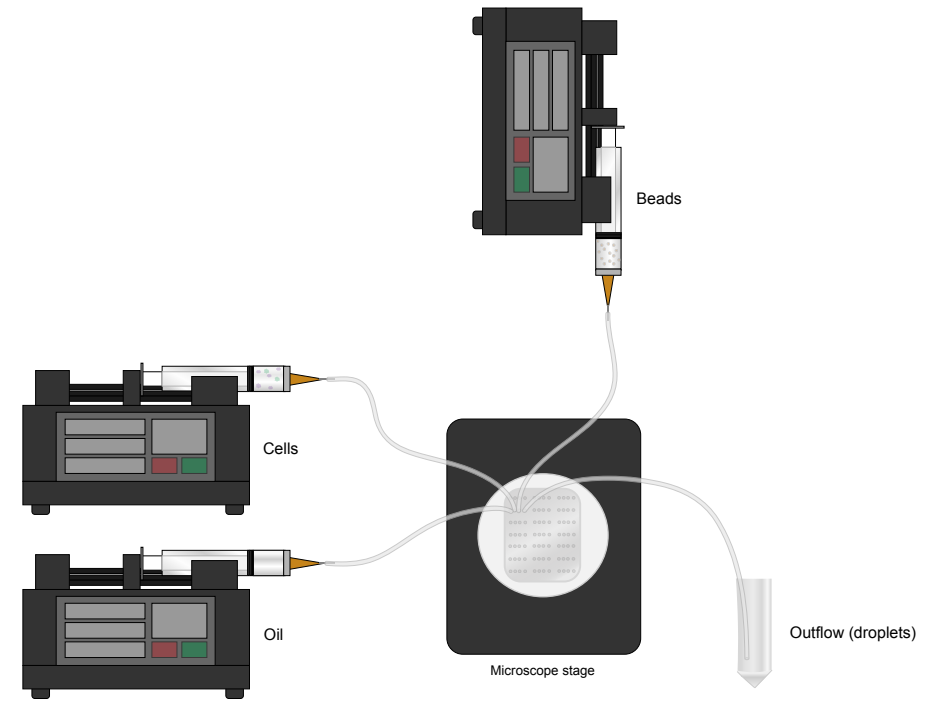

Supplement: NIHMS687993-supplement-Figure_S2.pdf [file NIHMS687993-supplement-Figure_S2.pdf]

# Supp. Figure 3

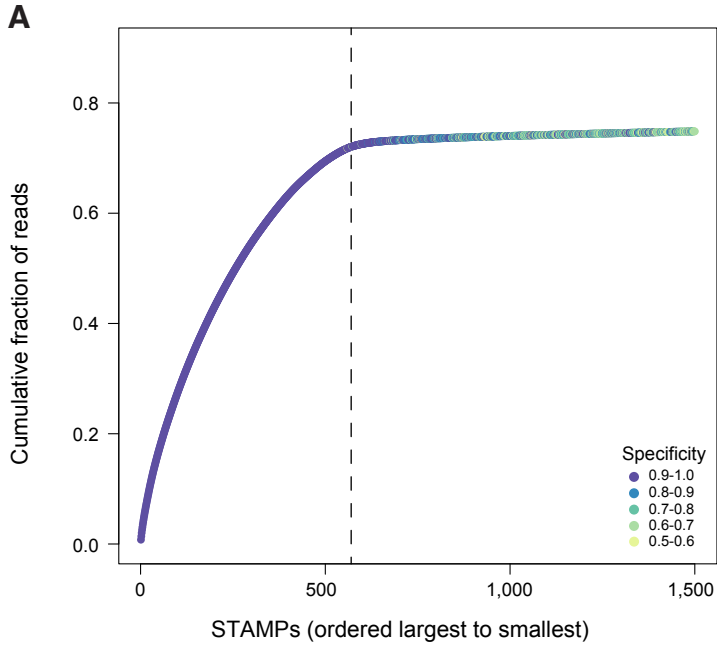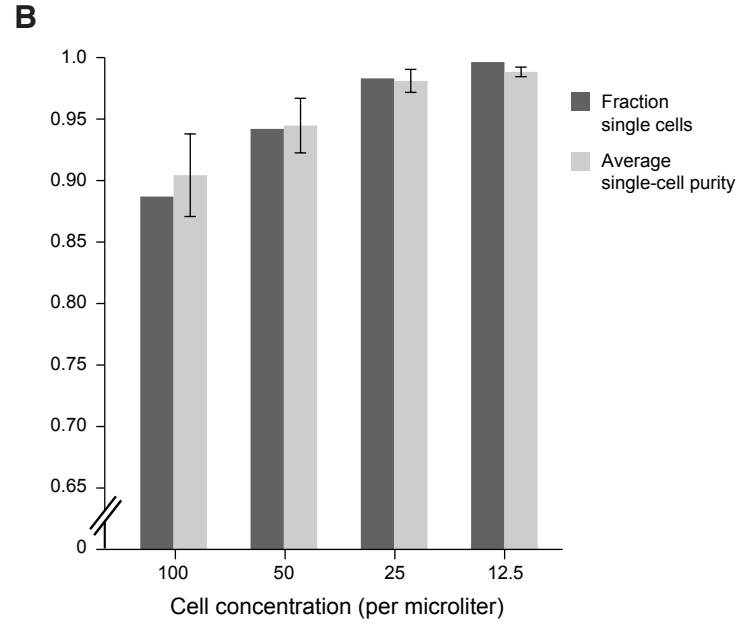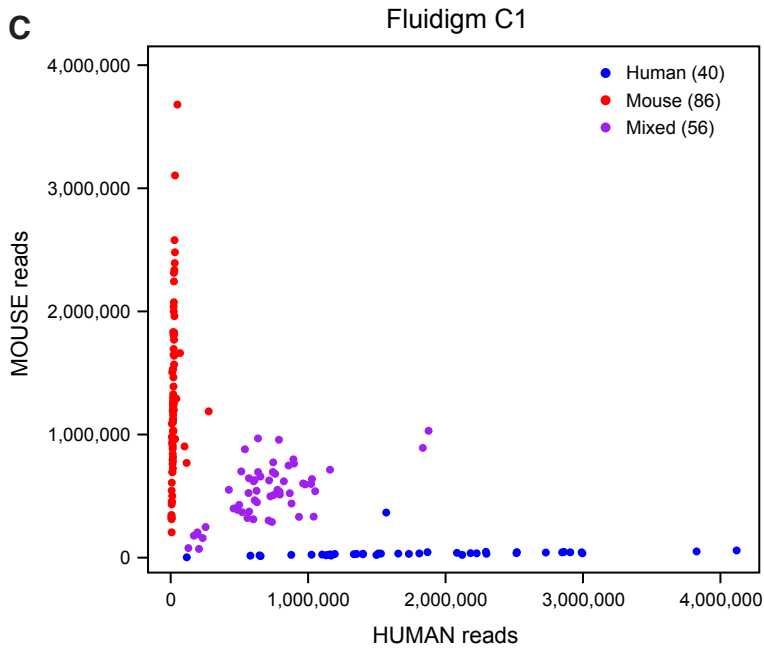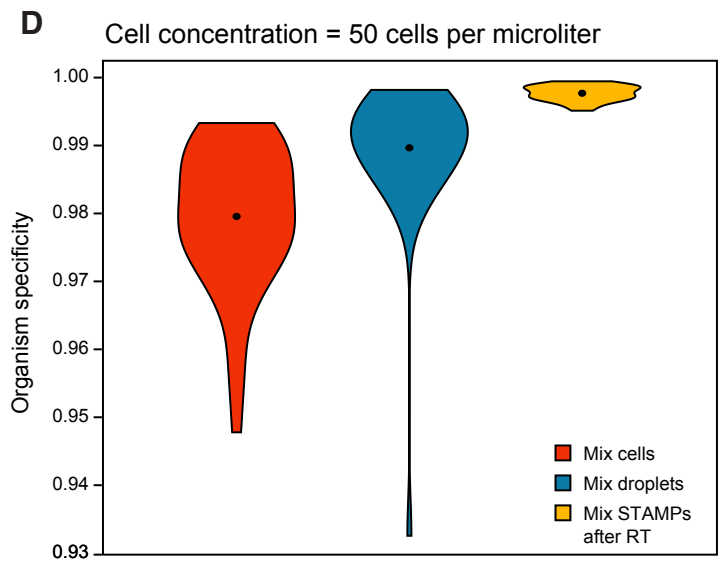

Supplement: NIHMS687993-supplement-Figure_S3.pdf [file NIHMS687993-supplement-Figure_S3.pdf]

# Supp. Figure 4

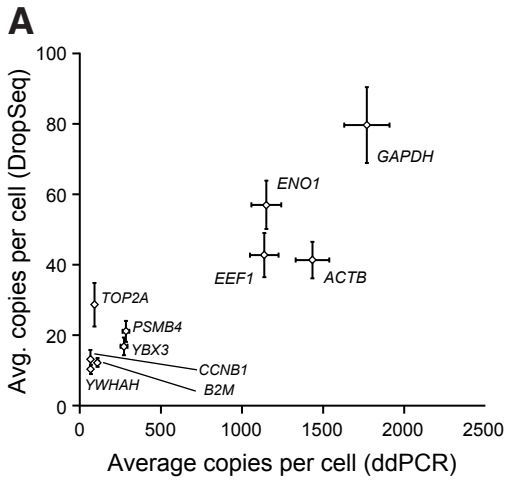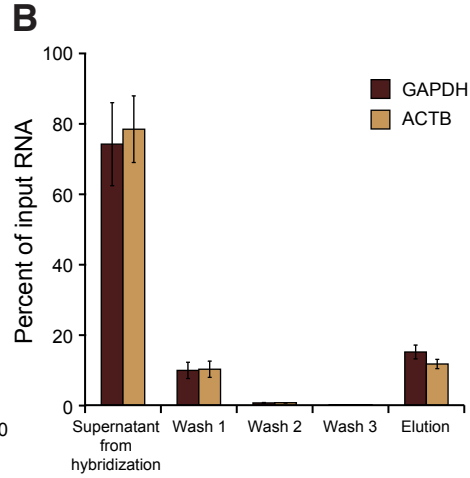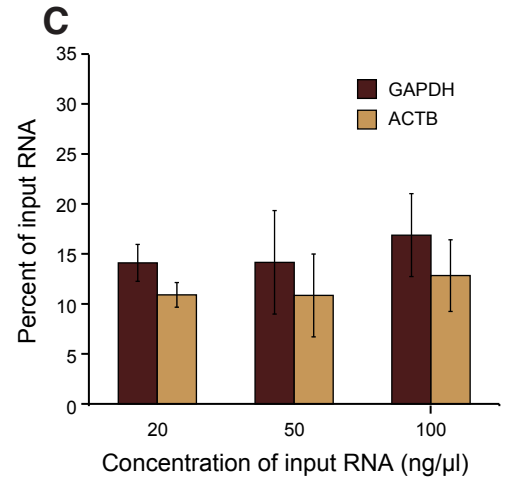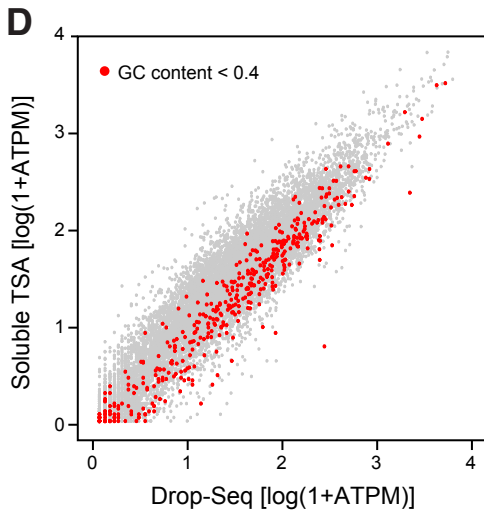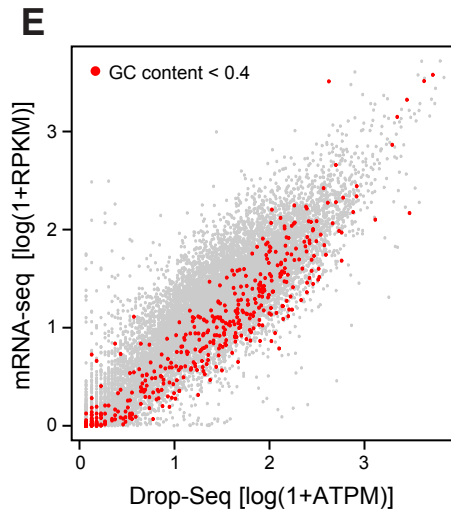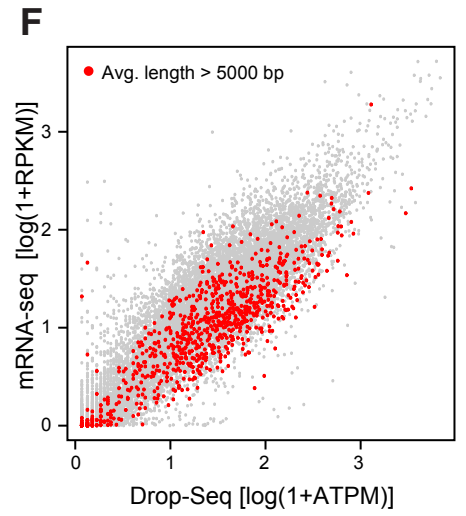

Supplement: NIHMS687993-supplement-Figure_S4.pdf [file NIHMS687993-supplement-Figure_S4.pdf]

# Supp. Figure 5

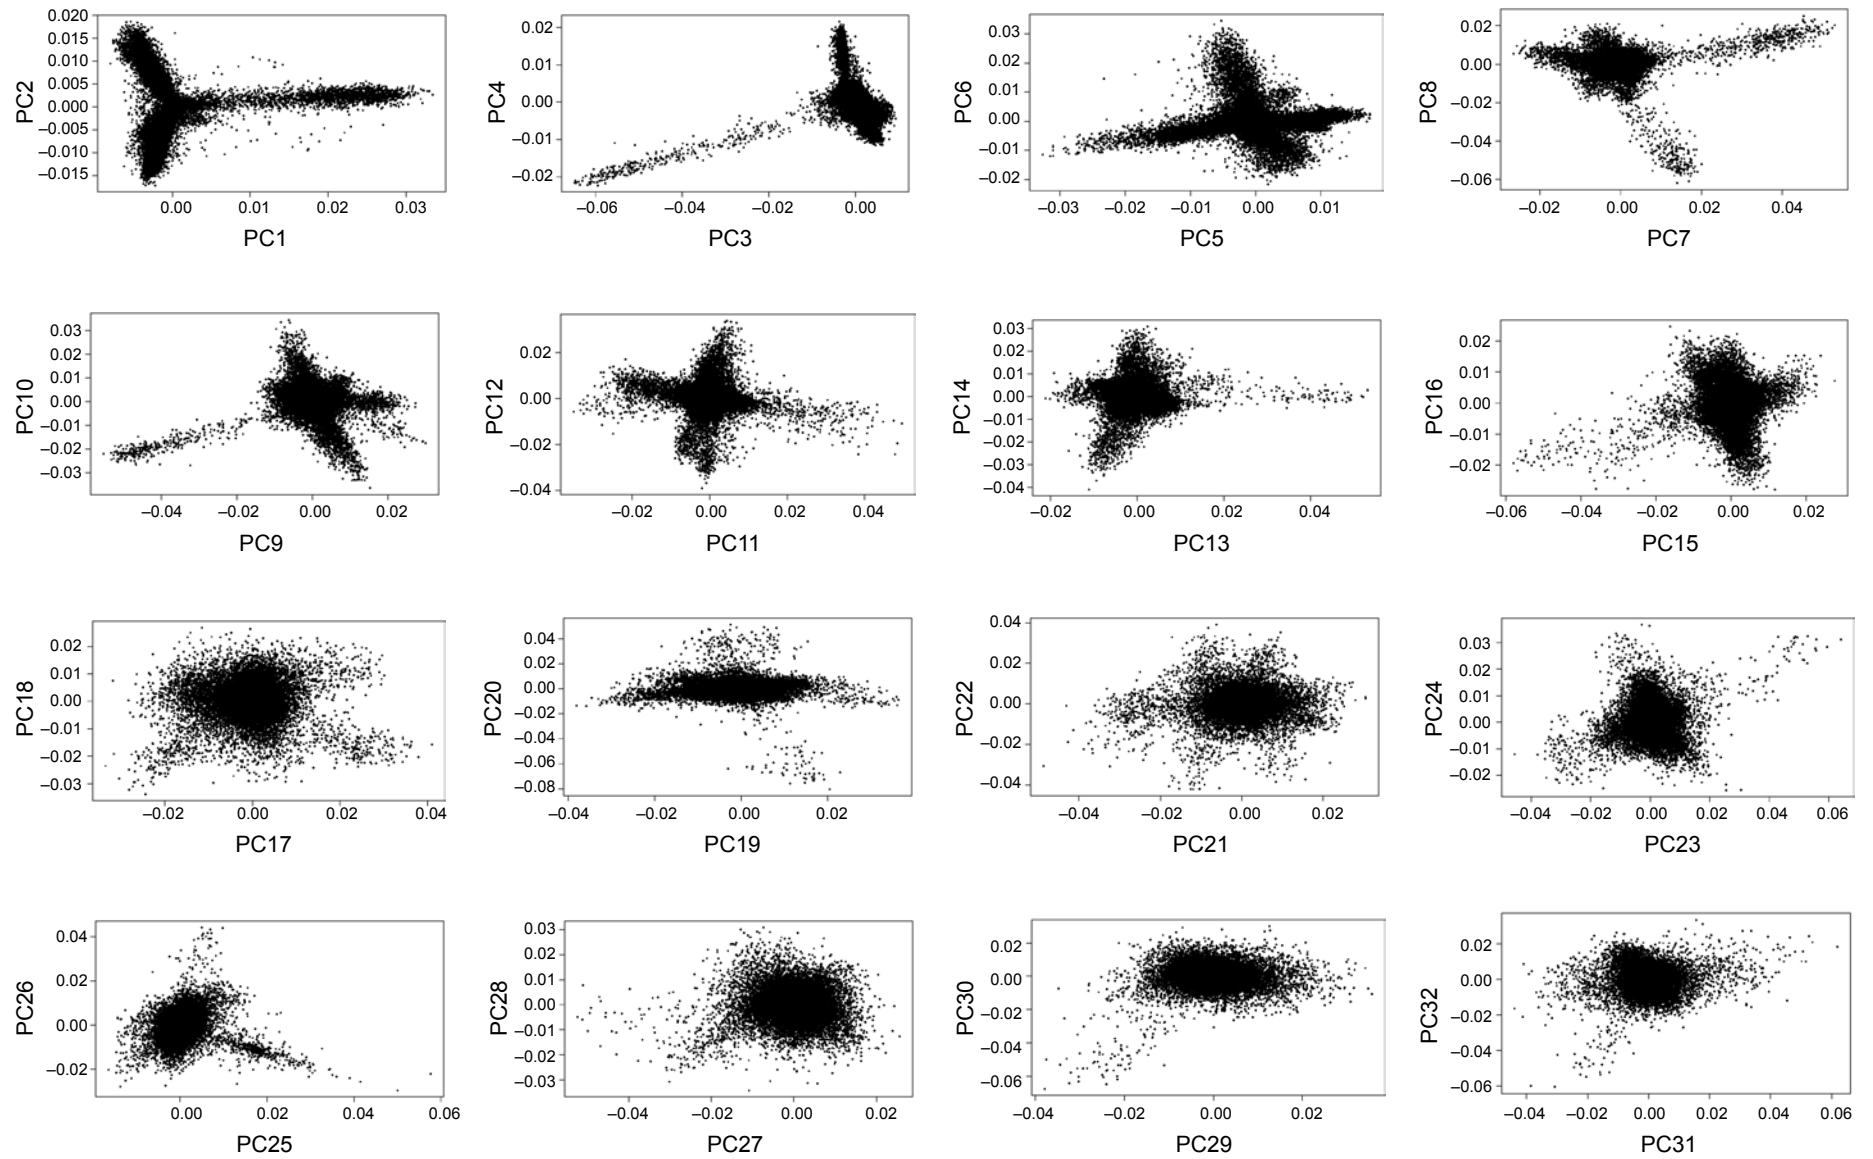

Supplement: NIHMS687993-supplement-Figure_S5.pdf [file NIHMS687993-supplement-Figure_S5.pdf]

**A**

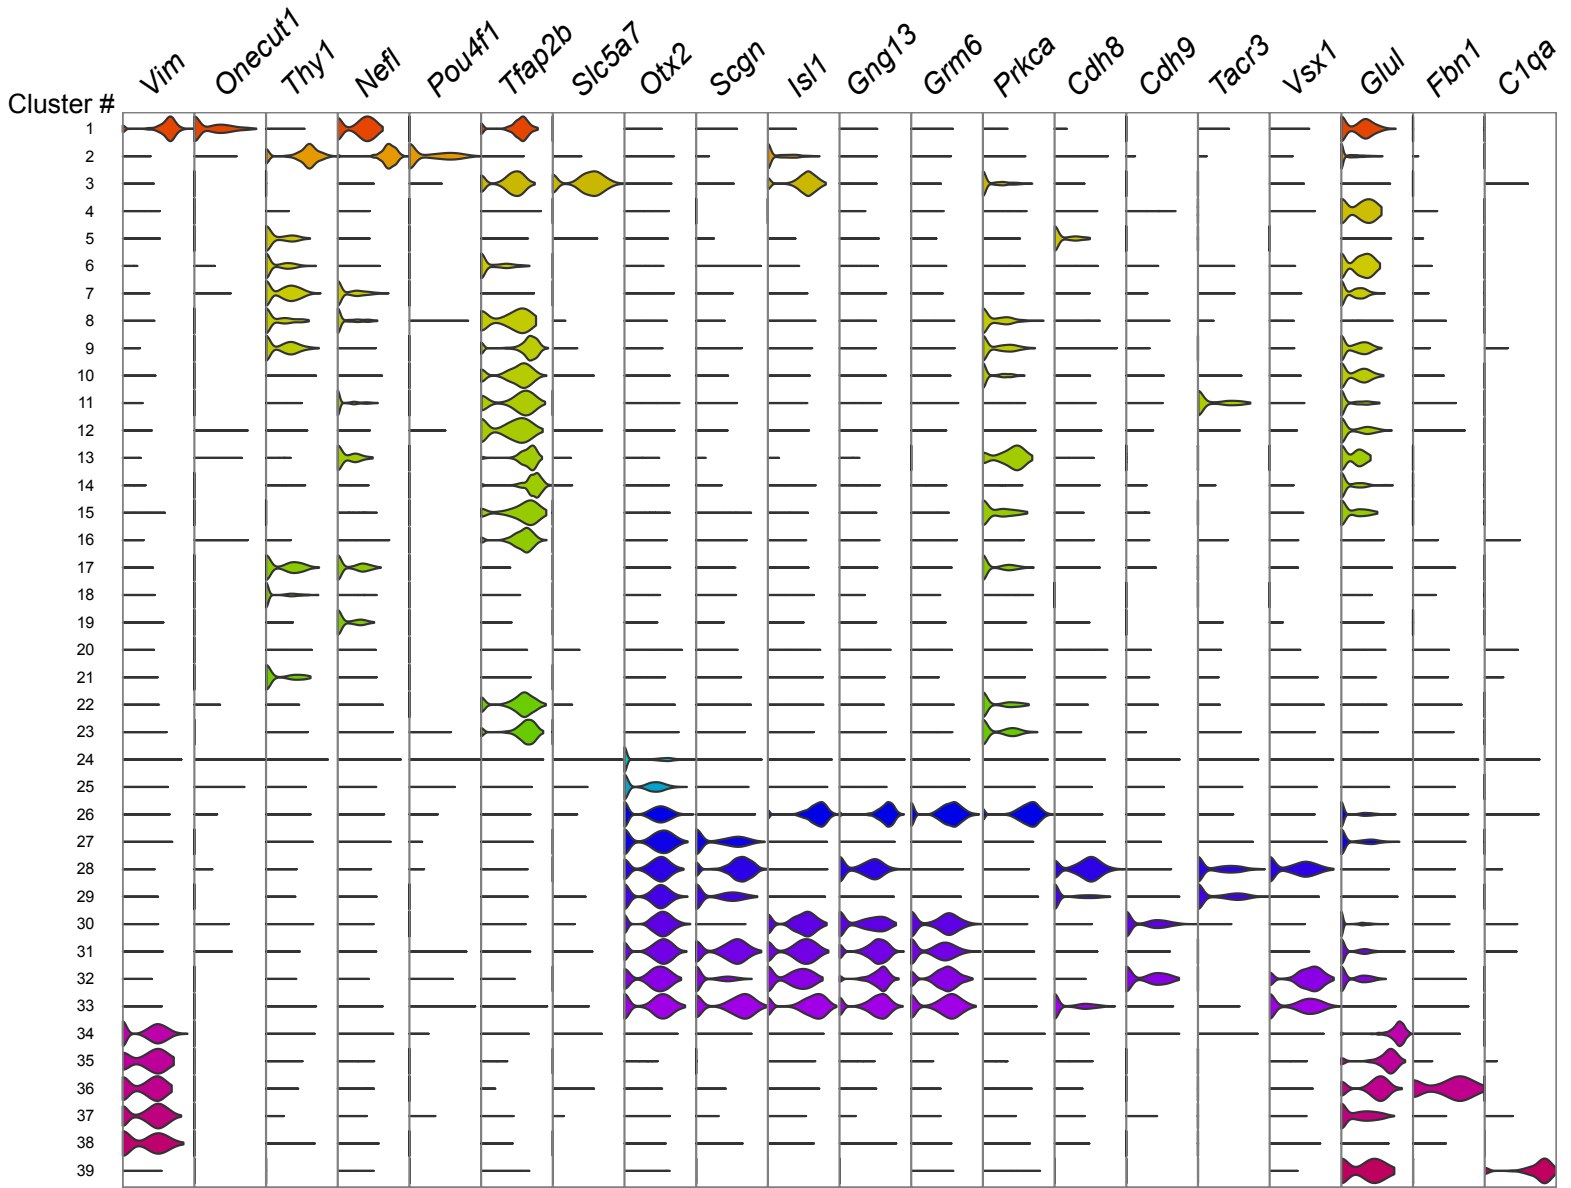

**B**

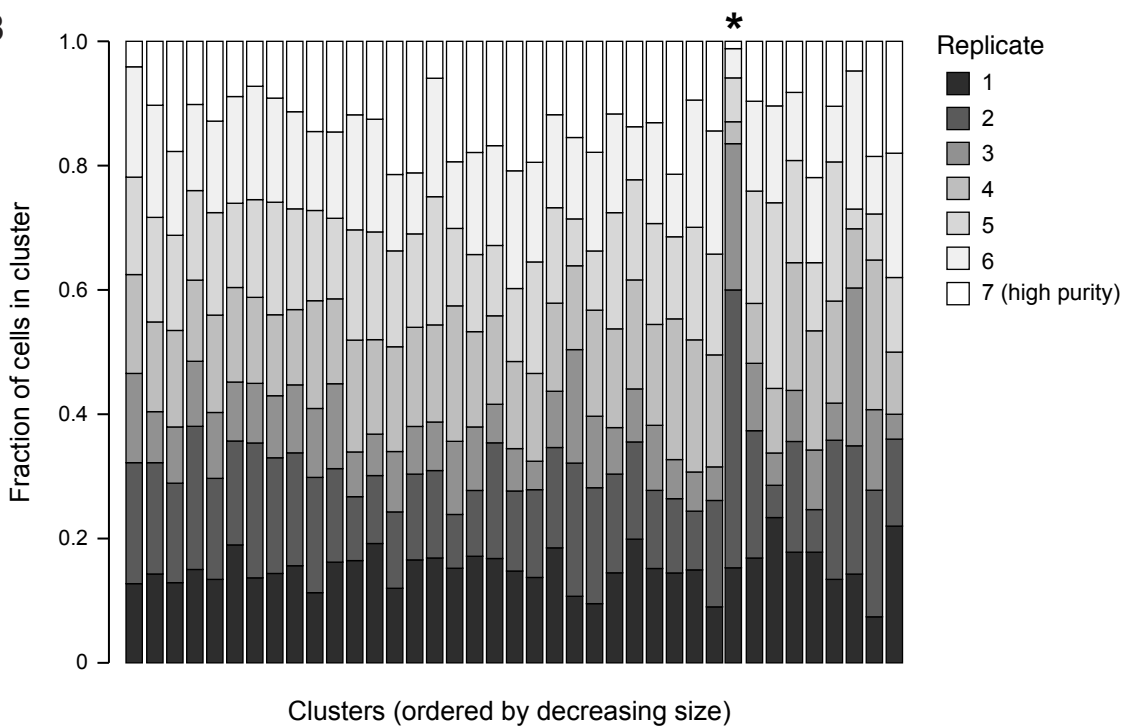

Supplement: NIHMS687993-supplement-Figure_S6.pdf [file NIHMS687993-supplement-Figure_S6.pdf]
